# Supplementary material for: LTBP2 is secreted from lung myofibroblasts and is a potential biomarker for idiopathic pulmonary fibrosis
Source: Oxford University Press journal article supplement (doi:10.1042/cs20180435), 2018-07-13
Supplement: cs20180435_supp1.pdf [file cs20180435_supp1.pdf]

## Supplementary material

### Title:

LTBP2 is secreted from lung myofibroblasts and is a potential biomarker for idiopathic pulmonary fibrosis

### Authors:

Yasunori Enomoto, Sayomi Matsushima, Kiyoshi Shibata, Yoichiro Aoshima, Haruna Yagi, Shiori Meguro, Hideya Kawasaki, Isao Kosugi, Tomoyuki Fujisawa, Noriyuki Enomoto, Naoki Inui, Yutaro Nakamura, Takafumi Suda, Toshihide Iwashita

### Supplementary Tables

**Table S1.** Antibodies used in FACS

| Primary antibody             | Target cells                      | Fluorescence | Company     | Dilution |
|------------------------------|-----------------------------------|--------------|-------------|----------|
| Anti-CD45                    | Blood cells                       | APC          | BioLegend   | 1:150    |
| Anti-TER-119                 | Erythrocytes                      | APC          | eBioscience | 1:150    |
| Anti-CD324 (E-cadherin)      | Epithelial cells                  | APC          | BioLegend   | 1:150    |
| Anti-CD31                    | Vascular endothelial cells        | APC          | BioLegend   | 1:150    |
| Anti-CD146                   | Smooth muscle cells and pericytes | APC          | BioLegend   | 1:150    |
| Anti-LYVE1                   | Lymphatic endothelial cells       | APC          | R&D         | 1:60     |
| Anti-Sca-1                   | Fibroblasts                       | PE-Cy7       | eBioscience | 1:600    |
| Anti-PDGFR $\alpha$ (CD140a) | Fibroblasts                       | PE           | BioLegend   | 1:50     |
| Streptavidin                 | (Biotin)                          | PerCP-Cy5.5  | BioLegend   | 1:300    |
| Anti-CD49e (integrin         | Myofibroblasts (cell surface      | (Biotin)     | Abcam       | 1:150    |

|                                     |                                         |      |       |       |
|-------------------------------------|-----------------------------------------|------|-------|-------|
| $\alpha 5$ )                        | marker)                                 |      |       |       |
| Anti- $\alpha$ -smooth muscle actin | Myofibroblasts (intra-cellular protein) | FITC | Abcam | 1:100 |

**Table S2.** Genes that are highly upregulated in myofibroblasts (MFB) or steady-state fibroblasts (FB) from mouse lungs

| <b>Genes upregulated in MFB</b>                          | <b>Symbol</b> | <b>MFB-signal</b> | <b>FB-signal</b> | <b>Fold change (MFB/FB)</b> |
|----------------------------------------------------------|---------------|-------------------|------------------|-----------------------------|
| Secreted phosphoprotein 1                                | <i>Spp1</i>   | 156374.3          | 15.1             | 10351.5                     |
| Gremlin 1                                                | <i>Grem1</i>  | 16794.8           | 14.6             | 1153.1                      |
| Kinesin family member 26B                                | <i>Kif26b</i> | 17524.0           | 17.8             | 984.3                       |
| Thrombospondin 4                                         | <i>Thbs4</i>  | 79551.2           | 164.4            | 483.8                       |
| Collagen triple helix repeat containing 1                | <i>Cthrc1</i> | 32474.7           | 141.2            | 230.0                       |
| Periostin, osteoblast specific factor                    | <i>Postn</i>  | 49741.5           | 224.0            | 222.0                       |
| Tenascin C                                               | <i>Tnc</i>    | 35515.7           | 186.9            | 190.0                       |
| Chondrolectin                                            | <i>Chodl</i>  | 17701.0           | 105.8            | 167.4                       |
| Desmin                                                   | <i>Des</i>    | 43449.3           | 442.6            | 98.2                        |
| Inhibin beta-A                                           | <i>Inhba</i>  | 93682.0           | 1789.1           | 52.4                        |
| Collagen, type VIII, alpha 1                             | <i>Col8a1</i> | 12495.5           | 262.7            | 47.6                        |
| Baculoviral IAP repeat-containing 5                      | <i>Birc5</i>  | 43879.4           | 1225.4           | 35.8                        |
| Actin, alpha 2, smooth muscle, aorta                     | <i>Acta2</i>  | 106982.3          | 3203.1           | 33.4                        |
| SHC (Src homology 2 domain containing) family, member 4  | <i>Shc4</i>   | 29557.0           | 937.9            | 31.5                        |
| Scleraxis                                                | <i>Scx</i>    | 19402.9           | 656.0            | 29.6                        |
| Heparin-binding EGF-like growth factor                   | <i>Hbegf</i>  | 25328.7           | 887.9            | 28.5                        |
| Procollagen-proline, 2-oxoglutarate 4-dioxygenase        | <i>P4ha3</i>  | 48170.5           | 1712.9           | 28.1                        |
| Transforming, acidic coiled-coil containing protein 3    | <i>Tacc3</i>  | 12922.9           | 495.0            | 26.1                        |
| Latent transforming growth factor beta binding protein 2 | <i>Ltbp2</i>  | 112347.8          | 4430.0           | 25.4                        |
| Activity regulated cytoskeletal-associated protein       | <i>Arc</i>    | 14632.2           | 686.5            | 21.3                        |
| Mesenchyme homeobox 1                                    | <i>Meox1</i>  | 15498.8           | 727.3            | 21.3                        |

|                                                                                |                |                   |                  |                             |
|--------------------------------------------------------------------------------|----------------|-------------------|------------------|-----------------------------|
| Actin, gamma 2, smooth muscle, enteric                                         | <i>Actg2</i>   | 22188.7           | 1146.0           | 19.4                        |
| Pleiotrophin                                                                   | <i>Ptn</i>     | 17711.5           | 930.7            | 19.0                        |
| Zinc finger, DHHC domain containing 3                                          | <i>Zdhhc3</i>  | 28057.0           | 1683.2           | 16.7                        |
| Collagen, type VII, alpha 1                                                    | <i>Col7a1</i>  | 38948.6           | 2678.5           | 14.5                        |
| 2,3-bisphosphoglycerate mutase                                                 | <i>Bpgm</i>    | 111491.4          | 7866.0           | 14.2                        |
| Collagen, type XII, alpha 1                                                    | <i>Col12a1</i> | 150876.1          | 12420.8          | 12.1                        |
| Family with sequence similarity 173, member B                                  | <i>Fam173b</i> | 14059.1           | 1162.7           | 12.1                        |
| Neuronal regeneration related protein                                          | <i>Nrep</i>    | 90753.0           | 7789.2           | 11.7                        |
| Tissue inhibitor of metalloproteinase 1                                        | <i>Timp1</i>   | 51218.5           | 4468.9           | 11.5                        |
| Discs, large (Drosophila) homolog-associated protein 2                         | <i>Dlgap2</i>  | 12334.5           | 1111.7           | 11.1                        |
| Fibronectin 1                                                                  | <i>Fn1</i>     | 108667.5          | 10496.6          | 10.4                        |
| Transgelin                                                                     | <i>Tagln</i>   | 99265.9           | 9621.9           | 10.3                        |
| Collagen, type V, alpha 3                                                      | <i>Col5a3</i>  | 25504.9           | 2504.9           | 10.2                        |
| Tropomyosin 2, beta                                                            | <i>Tpm2</i>    | 117555.4          | 12240.7          | 9.6                         |
| Lysyl oxidase-like 2                                                           | <i>Loxl2</i>   | 27945.0           | 3375.2           | 8.3                         |
| Elastin                                                                        | <i>Eln</i>     | 375373.3          | 48597.3          | 7.7                         |
| Collagen, type V, alpha 1                                                      | <i>Col5a1</i>  | 97043.5           | 15209.0          | 6.4                         |
| Sarcosine dehydrogenase                                                        | <i>Sardh</i>   | 13725.2           | 2195.3           | 6.3                         |
| Collagen, type IV, alpha 2                                                     | <i>Col4a2</i>  | 29962.5           | 4908.1           | 6.1                         |
| Chemokine (C-C motif) ligand 2                                                 | <i>Ccl2</i>    | 12963.0           | 2201.0           | 5.9                         |
| SPEG complex locus                                                             | <i>Speg</i>    | 17501.8           | 2999.8           | 5.8                         |
| Collagen, type VI, alpha 3                                                     | <i>Col6a3</i>  | 16958.0           | 3189.0           | 5.3                         |
| Secreted acidic cysteine rich glycoprotein                                     | <i>Sparc</i>   | 554817.5          | 105624.7         | 5.3                         |
| <b>Genes upregulated in steady-state FB</b>                                    | <b>Symbol</b>  | <b>MFB-signal</b> | <b>FB-signal</b> | <b>Fold change (FB/MFB)</b> |
| Delta/notch-like EGF-related receptor                                          | <i>Dner</i>    | 319.6             | 15308.1          | 47.9                        |
| Sodium channel, voltage-gated, type III, alpha                                 | <i>Scn3a</i>   | 425.7             | 14025.8          | 32.9                        |
| ABI gene family, member 3 (NESH) binding protein                               | <i>Abi3bp</i>  | 465.9             | 13804.5          | 29.6                        |
| FMS-like tyrosine kinase 3 ligand                                              | <i>Flt3l</i>   | 2997.3            | 88458.0          | 29.5                        |
| Retinol binding protein 4, plasma                                              | <i>Rbp4</i>    | 569.2             | 16108.8          | 28.3                        |
| Solute carrier family 10 (sodium/bile acid cotransporter family), member 6     | <i>Slc10a6</i> | 763.1             | 16598.2          | 21.8                        |
| Gamma-aminobutyric acid (GABA) A receptor, subunit alpha 3                     | <i>Gabra3</i>  | 2820.6            | 50110.7          | 17.8                        |
| Adrenergic receptor, beta 3                                                    | <i>Adrb3</i>   | 800.3             | 13909.5          | 17.4                        |
| Epidermal growth factor-containing fibulin-like extracellular matrix protein 1 | <i>Efemp1</i>  | 4169.3            | 71505.8          | 17.2                        |
| Cell adhesion molecule-related/down-regulated by oncogenes                     | <i>Cdon</i>    | 1643.3            | 27186.1          | 16.5                        |
| Mitochondrial transcription termination factor 4                               | <i>Mterf4</i>  | 1376.0            | 21849.2          | 15.9                        |

|                                                                                  |                |         |          |      |
|----------------------------------------------------------------------------------|----------------|---------|----------|------|
| Dipeptidase 1 (renal)                                                            | <i>Dpep1</i>   | 3009.2  | 47483.6  | 15.8 |
| ATP-binding cassette, sub-family A (ABC1), member 8a                             | <i>Abca8a</i>  | 1325.0  | 19997.0  | 15.1 |
| Fibulin 1                                                                        | <i>Fbln1</i>   | 7692.5  | 108968.4 | 14.2 |
| Apolipoprotein D                                                                 | <i>Apod</i>    | 2072.4  | 29043.0  | 14.0 |
| Phosphatidic acid phosphatase type 2B                                            | <i>Ppap2b</i>  | 3124.7  | 43473.8  | 13.9 |
| A kinase (PRKA) anchor protein (gravin) 12                                       | <i>Akap12</i>  | 10163.1 | 136662.8 | 13.4 |
| Growth differentiation factor 10                                                 | <i>Gdf10</i>   | 4296.0  | 56210.1  | 13.1 |
| Complement component 7                                                           | <i>C7</i>      | 1347.9  | 16344.2  | 12.1 |
| Complement component factor h                                                    | <i>Cfh</i>     | 9081.6  | 108051.4 | 11.9 |
| Osteoglycin                                                                      | <i>Ogn</i>     | 5302.9  | 62204.3  | 11.7 |
| Solute carrier family 38, member 5                                               | <i>Slc38a5</i> | 5386.2  | 59901.3  | 11.1 |
| Matrix metalloproteinase 3                                                       | <i>Mmp3</i>    | 3321.7  | 34777.3  | 10.5 |
| RGD motif, leucine rich repeats, tropomodulin domain and proline-rich containing | <i>Rltpr</i>   | 1911.5  | 19913.5  | 10.4 |
| Coagulation factor III                                                           | <i>F3</i>      | 4354.1  | 43716.7  | 10.0 |
| Progesterin and adipoQ receptor family member VI                                 | <i>Paqr6</i>   | 1668.1  | 16197.0  | 9.7  |
| Hedgehog-interacting protein                                                     | <i>Hhip</i>    | 1388.7  | 13304.8  | 9.6  |
| Complement factor H-related 2                                                    | <i>Cfhr2</i>   | 4355.1  | 40274.9  | 9.2  |
| 3-hydroxy-3-methylglutaryl-Coenzyme A synthase 2                                 | <i>Hmgcs2</i>  | 2037.9  | 18390.0  | 9.0  |
| Gelsolin                                                                         | <i>Gsn</i>     | 72027.0 | 647052.8 | 9.0  |
| Bone morphogenetic protein 4                                                     | <i>Bmp4</i>    | 3748.1  | 33637.8  | 9.0  |
| Hydroxysteroid 11-beta dehydrogenase 1                                           | <i>Hsd11b1</i> | 4025.1  | 35932.1  | 8.9  |
| Podocan                                                                          | <i>Podn</i>    | 1918.9  | 16890.0  | 8.8  |
| Glypican 6                                                                       | <i>Gpc6</i>    | 2993.9  | 24704.9  | 8.3  |
| Integrin, beta-like 1                                                            | <i>Itgbl1</i>  | 1918.1  | 15445.6  | 8.1  |
| Angiopoietin 1                                                                   | <i>Angpt1</i>  | 4720.3  | 36485.2  | 7.7  |
| Platelet derived growth factor receptor, alpha polypeptide                       | <i>Pdgfra</i>  | 11852.0 | 86126.0  | 7.3  |
| Insulin-like growth factor binding protein 6                                     | <i>Igfbp6</i>  | 8787.8  | 63348.0  | 7.2  |
| Complement component 4B (Chido blood group)                                      | <i>C4b</i>     | 6995.2  | 49948.4  | 7.1  |
| Very low density lipoprotein receptor                                            | <i>Vldlr</i>   | 2062.4  | 14483.7  | 7.0  |
| C-fos induced growth factor                                                      | <i>Figf</i>    | 4176.8  | 28956.9  | 6.9  |
| Sulfotransferase family 5A, member 1                                             | <i>Sult5a1</i> | 7031.9  | 48640.0  | 6.9  |
| Complement component 1, s subcomponent 2                                         | <i>C1s2</i>    | 9771.5  | 66757.1  | 6.8  |
| Decorin                                                                          | <i>Dcn</i>     | 24793.5 | 167281.3 | 6.7  |
| Integrin alpha 8                                                                 | <i>Itga8</i>   | 8519.4  | 56961.3  | 6.7  |
| Neuroblastoma, suppression of tumorigenicity 1                                   | <i>Nbl1</i>    | 7885.3  | 52238.2  | 6.6  |

|                                                                                        |                |         |          |     |
|----------------------------------------------------------------------------------------|----------------|---------|----------|-----|
| Peptidase inhibitor 16                                                                 | <i>Pil6</i>    | 2352.5  | 14502.6  | 6.2 |
| Tumor necrosis factor alpha induced protein 6                                          | <i>Tnfaip6</i> | 6374.6  | 38703.5  | 6.1 |
| HtrA serine peptidase 3                                                                | <i>Htra3</i>   | 5375.2  | 31504.5  | 5.9 |
| Complement component 3                                                                 | <i>C3</i>      | 62397.1 | 363510.2 | 5.8 |
| Complement component 1, s subcomponent 1                                               | <i>C1s1</i>    | 9683.9  | 56265.3  | 5.8 |
| Collagen, type XIII, alpha 1                                                           | <i>Coll3a1</i> | 5510.2  | 31843.6  | 5.8 |
| Alcohol dehydrogenase 1 (class I)                                                      | <i>Adh1</i>    | 14653.7 | 79543.6  | 5.4 |
| Sushi, von Willebrand factor type A, EGF and pentraxin domain containing 1             | <i>Svep1</i>   | 8957.6  | 47882.3  | 5.3 |
| Interleukin 6                                                                          | <i>Il6</i>     | 6277.5  | 33302.5  | 5.3 |
| NADPH oxidase 4                                                                        | <i>Nox4</i>    | 4753.6  | 24154.9  | 5.1 |
| Sema domain, immunoglobulin domain (Ig), short basic domain, secreted, (semaphorin) 3D | <i>Sema3d</i>  | 2641.6  | 13387.7  | 5.1 |
| Slit homolog 3 (Drosophila)                                                            | <i>Slit3</i>   | 7279.1  | 36823.0  | 5.1 |
| RNA binding motif, single stranded interacting protein                                 | <i>Rbms3</i>   | 2767.8  | 13864.8  | 5.0 |

Genes that are upregulated in MFB were selected according to the following criteria: (1) five-fold greater than in steady-state FB; (2) five-fold greater than in total lung homogenates; and (3) two-fold greater than the mean value of all genes in MFB. Conversely, genes upregulated in steady-state FB were defined according to the following criteria: (1) five-fold greater than in MFB; (2) five-fold greater than in total lung homogenates; and (3) two-fold greater than the mean value of all genes in steady-state FB. The listed genes are available in the NCBI Reference Sequence.

**Table S3.** Gene ontology profiles of genes that are highly upregulated in myofibroblasts (MFB) or steady-state fibroblasts (FB) from mouse lungs

| <b>Gene ontology terms of upregulated genes in MFB</b>             | <b>Number (n = 44)</b> | <b>p</b> |
|--------------------------------------------------------------------|------------------------|----------|
| Proteinaceous extracellular matrix                                 | 17                     | 5.60E-18 |
| Extracellular matrix                                               | 15                     | 1.40E-17 |
| Basement membrane                                                  | 11                     | 1.50E-14 |
| Secreted                                                           | 22                     | 1.10E-12 |
| Extracellular space                                                | 20                     | 2.00E-10 |
| Extracellular region                                               | 21                     | 3.20E-10 |
| Collagen                                                           | 8                      | 3.30E-10 |
| Endodermal cell differentiation                                    | 6                      | 4.60E-09 |
| ECM-receptor interaction                                           | 8                      | 8.00E-09 |
| Collagen triple helix repeat                                       | 7                      | 1.10E-08 |
| Hydroxylation                                                      | 7                      | 2.10E-08 |
| Signal peptide                                                     | 25                     | 2.40E-08 |
| Signal                                                             | 27                     | 2.80E-08 |
| Collagen trimer                                                    | 7                      | 3.40E-08 |
| Focal adhesion                                                     | 9                      | 1.70E-07 |
| Protein digestion and absorption                                   | 7                      | 2.70E-07 |
| Domain:Fibronectin type-III 9                                      | 4                      | 7.40E-06 |
| Disulfide bond                                                     | 19                     | 1.30E-05 |
| Cell adhesion                                                      | 9                      | 1.60E-05 |
| Domain:Fibronectin type-III 7                                      | 4                      | 3.00E-05 |
| TSPN                                                               | 4                      | 3.90E-05 |
| Short sequence motif:Cell attachment site                          | 5                      | 4.10E-05 |
| Domain:Fibronectin type-III 6                                      | 4                      | 4.80E-05 |
| Glycoprotein                                                       | 20                     | 5.20E-05 |
| Fibronectin, type III                                              | 6                      | 7.60E-05 |
| Region of interest:Nonhelical region (NC2)                         | 3                      | 8.70E-05 |
| PI3K-Akt signaling pathway                                         | 8                      | 8.90E-05 |
| Domain:Fibronectin type-III 14                                     | 3                      | 1.20E-04 |
| Extracellular matrix structural constituent                        | 4                      | 1.20E-04 |
| Region of interest:Nonhelical region (NC1)                         | 3                      | 1.20E-04 |
| Domain:Fibronectin type-III 5                                      | 4                      | 1.30E-04 |
| Extracellular matrix organization                                  | 5                      | 1.50E-04 |
| Domain:Fibronectin type-III 2                                      | 5                      | 2.30E-04 |
| Domain:Fibronectin type-III 1                                      | 5                      | 2.40E-04 |
| Laminin G domain                                                   | 4                      | 2.40E-04 |
| Domain:Fibronectin type-III 11                                     | 3                      | 2.60E-04 |
| Domain:Fibronectin type-III 12                                     | 3                      | 2.60E-04 |
| Domain:Fibronectin type-III 10                                     | 3                      | 3.20E-04 |
| Domain:Fibronectin type-III 4                                      | 4                      | 3.80E-04 |
| Domain:Fibronectin type-III 3                                      | 4                      | 8.40E-04 |
| Region of interest:Triple-helical region                           | 3                      | 8.70E-04 |
| Domain:TSP N-terminal                                              | 3                      | 9.70E-04 |
| <b>Gene ontology terms of upregulated genes in steady-state FB</b> | <b>Number (n = 59)</b> | <b>p</b> |

|                                                        |    |          |
|--------------------------------------------------------|----|----------|
| Disulfide bond                                         | 40 | 3.20E-20 |
| Signal peptide                                         | 41 | 6.10E-19 |
| Signal                                                 | 44 | 2.50E-18 |
| Extracellular region                                   | 31 | 3.00E-17 |
| Disulfide bond                                         | 36 | 5.40E-17 |
| Extracellular space                                    | 29 | 6.80E-17 |
| Secreted                                               | 29 | 1.00E-16 |
| EGF-like domain                                        | 10 | 6.20E-09 |
| EGF-like calcium-binding, conserved site               | 8  | 1.20E-08 |
| EGF-type aspartate/asparagine hydroxylation site       | 8  | 1.20E-08 |
| EGF-like calcium-binding                               | 8  | 7.10E-08 |
| Insulin-like growth factor binding protein, N-terminal | 8  | 8.80E-08 |
| Complement activation                                  | 5  | 1.10E-07 |
| Proteinaceous extracellular matrix                     | 10 | 2.90E-07 |
| Complement and coagulation cascades                    | 7  | 3.00E-07 |
| EGF_CA                                                 | 8  | 5.10E-07 |
| Sushi/SCR/CCP                                          | 6  | 5.50E-07 |
| Anaphylatoxin/fibulin                                  | 4  | 7.80E-07 |
| Classical Complement Pathway                           | 5  | 1.40E-06 |
| CCP                                                    | 6  | 2.00E-06 |
| ANATO                                                  | 4  | 2.00E-06 |
| Blood microparticle                                    | 7  | 2.30E-06 |
| Epidermal growth factor-like domain                    | 8  | 5.00E-06 |
| EGF                                                    | 8  | 5.80E-06 |
| Complement Pathway                                     | 5  | 8.30E-06 |
| Growth factor                                          | 6  | 2.00E-05 |
| EGF-like, conserved site                               | 7  | 2.10E-05 |
| Domain:EGF-like 1                                      | 6  | 2.40E-05 |
| Staphylococcus aureus infection                        | 5  | 3.30E-05 |
| Extracellular matrix                                   | 7  | 3.30E-05 |
| Domain:Anaphylatoxin-like                              | 3  | 5.70E-05 |
| Complement C3a/C4a/C5a anaphylatoxin                   | 3  | 8.00E-05 |
| Anaphylatoxin                                          | 3  | 8.00E-05 |
| Lectin Induced Complement Pathway                      | 4  | 9.80E-05 |
| Growth factor activity                                 | 6  | 1.00E-04 |
| Pertussis                                              | 5  | 1.50E-04 |
| Domain:Sushi 1                                         | 4  | 1.70E-04 |
| Domain:Sushi 2                                         | 4  | 1.70E-04 |
| Sushi                                                  | 4  | 2.50E-04 |
| Positive regulation of ERK1 and ERK2 cascade           | 6  | 2.90E-04 |
| Cross-link:Isoglutamyl cysteine thioester (Cys-Gln)    | 3  | 3.40E-04 |
| Calcium ion binding                                    | 10 | 3.50E-04 |
| Alpha-2-macroglobulin, conserved site                  | 3  | 3.60E-04 |
| Alpha-2-macroglobulin, thiol-ester bond-forming        | 3  | 3.60E-04 |
| A-macroglobulin complement component                   | 3  | 4.40E-04 |

|                                                                 |    |          |
|-----------------------------------------------------------------|----|----------|
| Alpha-macroglobulin, receptor-binding                           | 3  | 4.40E-04 |
| Alpha-2-macroglobulin, N-terminal                               | 3  | 5.20E-04 |
| Alpha-2-macroglobulin                                           | 3  | 5.20E-04 |
| Alpha-2-macroglobulin, N-terminal 2                             | 3  | 5.20E-04 |
| Domain:EGF-like 2; calcium-binding                              | 4  | 5.60E-04 |
| Complement activation, classical pathway                        | 4  | 6.60E-04 |
| SM01359                                                         | 3  | 8.10E-04 |
| SM01361                                                         | 3  | 8.10E-04 |
| Terpenoid cyclases/protein prenyltransferase alpha-alpha toroid | 3  | 8.30E-04 |
| Developmental protein                                           | 10 | 8.80E-04 |
| SM01360                                                         | 3  | 9.70E-04 |

Genes listed here were selected in accordance with Table S2.

**Table S4.** Sequences of gene-specific primers used in this study

| <b>Mouse</b>                                                              | <b>Forward primer</b> | <b>Reverse primer</b> |
|---------------------------------------------------------------------------|-----------------------|-----------------------|
| Glyceraldehyde-3-phosphate dehydrogenase ( <i>Gapdh</i> )                 | aactttggcattgtggaagg  | ggatgcagggatgatgttct  |
| Actin, alpha 2, smooth muscle, aorta ( <i>Acta2</i> )                     | tgtgctggactctggagatg  | gaaggaatagccacgctcag  |
| Latent transforming growth factor beta-binding protein-2 ( <i>Ltbp2</i> ) | gcgaatgcaagaacacagaa  | aatgctcttccccaacacac  |
| <b>Human</b>                                                              | <b>Forward primer</b> | <b>Reverse primer</b> |
| Glyceraldehyde-3-phosphate dehydrogenase ( <i>GAPDH</i> )                 | cctgcaccaccaactgctta  | gtcaaaggtggaggagtggg  |
| Actin, alpha 2, smooth muscle, aorta ( <i>ACTA2</i> )                     | aagacagctacgtgggtgac  | atcttctcccgggttgccctt |
| Latent transforming growth factor beta-binding protein-2 ( <i>LTBP2</i> ) | ggatggacaacagcaaacagc | catcggaatgacctctcgc   |

**Table S5.** Comparison of clinical factors between groups with higher levels (>18 ng/mL) and lower levels (≤18 ng/mL) of serum LTBP2 in patients with idiopathic pulmonary fibrosis



|                                     | <b>LTBP2-high</b> | <b>LTBP2-low</b> | <b>p</b> |
|-------------------------------------|-------------------|------------------|----------|
|                                     | <b>n = 65</b>     | <b>n = 51</b>    |          |
| Age, years                          | 73 (68–78)        | 68 (63–73)       | <0.05    |
| Male                                | 57 (88)           | 44 (86)          | NS       |
| Current or former smoker            | 52 (80)           | 44 (86)          | NS       |
| Smoking dose (pack-year)            | 34 (10–50)        | 40 (20–63)       | NS       |
| PaO <sub>2</sub> on room air (Torr) | 75 (64–84)        | 78 (71–88)       | <0.05    |
| % predicted FVC (%)                 | 67 (54–84)        | 83 (69–94)       | <0.01    |
| % predicted DLCO (%)                | 58 (48–79)        | 67 (54–84)       | NS       |
| Serum KL-6 (U/mL)                   | 1105 (773–1705)   | 864 (515–1231)   | <0.05    |
| Serum SP-D (ng/mL)                  | 239 (169–369)     | 211 (127–274)    | NS       |
| Serum LDH (U/L)                     | 238 (209–279)     | 218 (199–262)    | NS       |

Data are described as n (%) or median (interquartile range). All p values were evaluated by Fisher's exact test or the Mann–Whitney U test as appropriate.

Abbreviations: DLCO = diffusion capacity for carbon monoxide; FVC = forced vital capacity; KL-6 = Krebs von den Lungen-6; LDH = lactate dehydrogenase; LTBP2 = latent transforming growth factor- $\beta$  binding protein-2; NS = not significant; SP-D = surfactant protein-D.

Supplementary figure legends

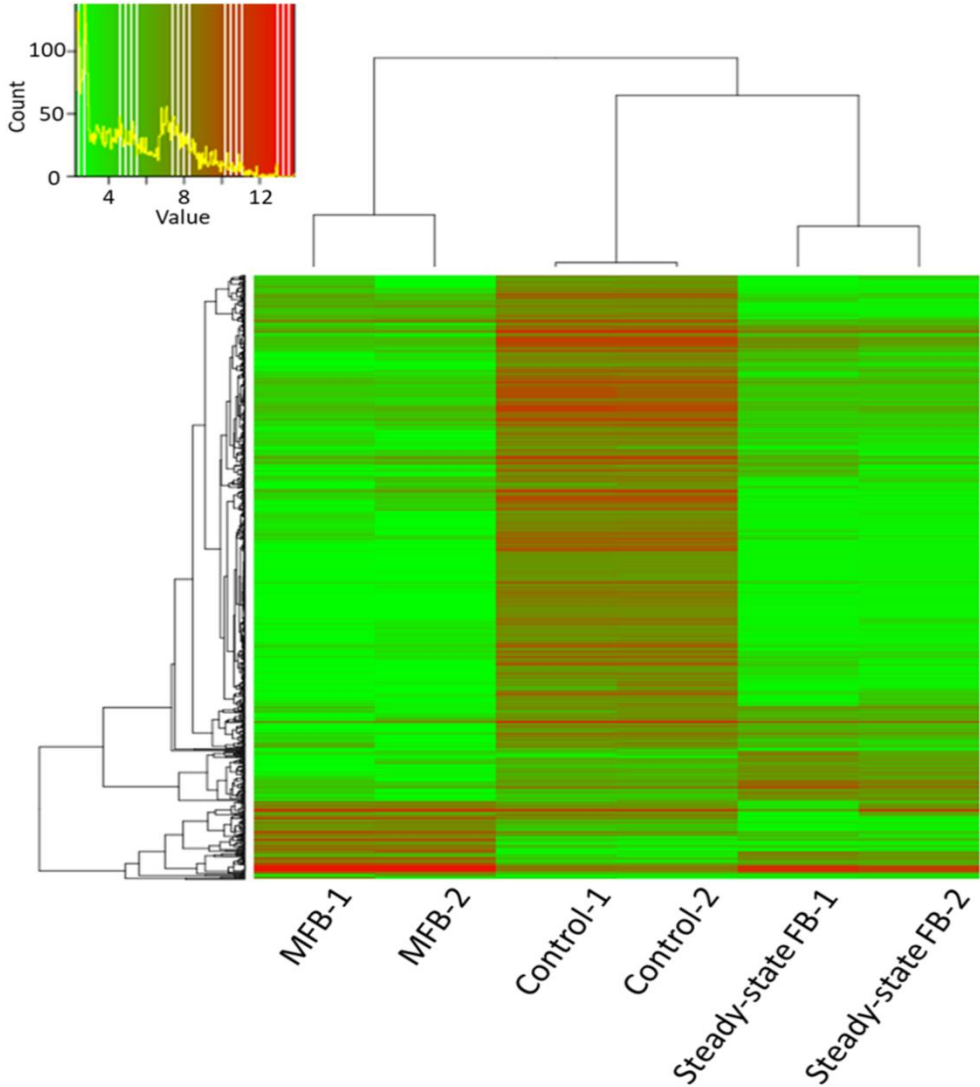

Figure S1. Heatmap of gene expression profiles in each sample

This heatmap is generated using a list of the top 1,000 genes with a large signal gap among all samples (myofibroblasts [MFB], steady-state fibroblasts [FB], and controls). Lung homogenates are used as controls.

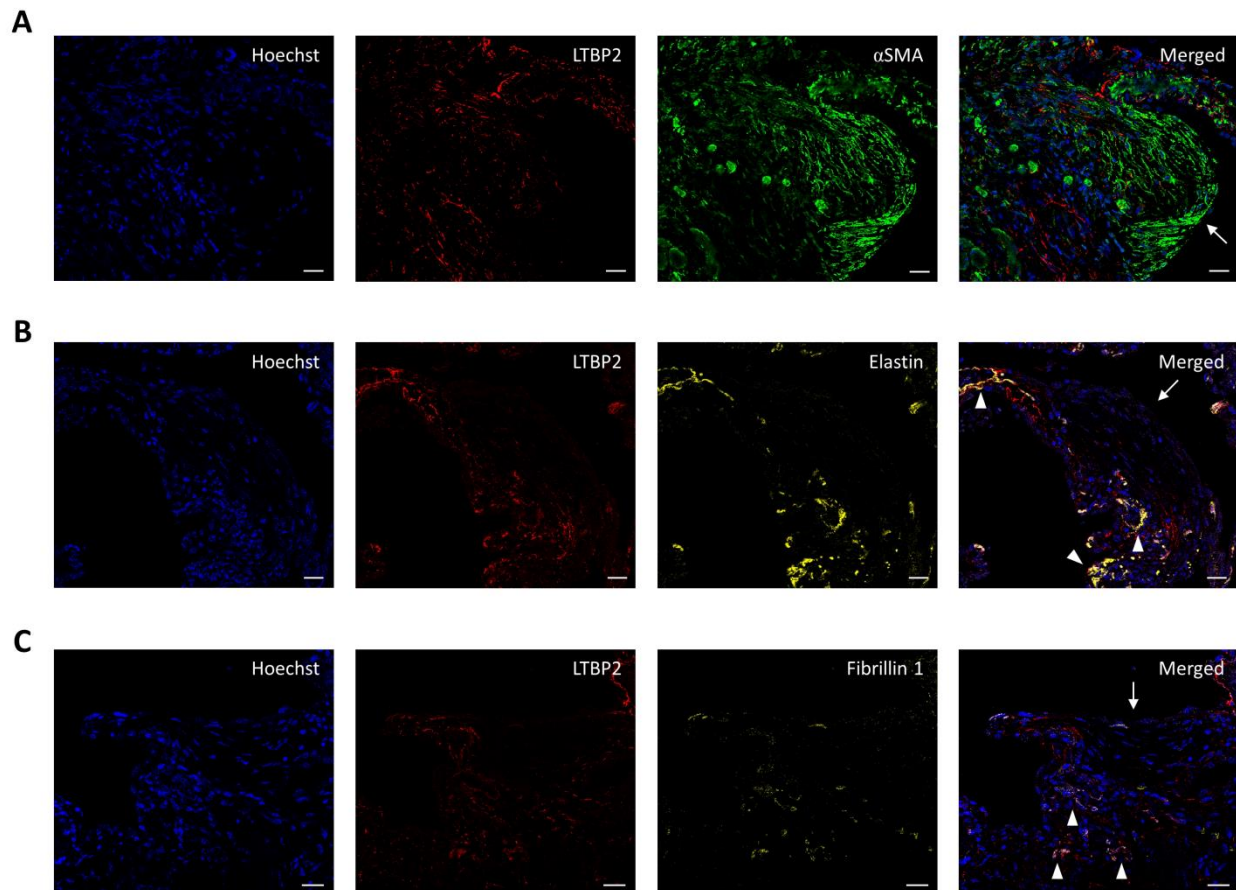

**Figure S2.** Immunofluorescence images of fibrotic lesions, including fibroblastic foci, in a biopsied lung of idiopathic pulmonary fibrosis

A. Anti-latent transforming growth factor- $\beta$  binding protein-2 (LTBP2) and anti- $\alpha$ -smooth

muscle actin ( $\alpha$ SMA) staining. LTBP2 is broadly upregulated in the fibrotic interstitium but was scarce in the  $\alpha$ SMA-positive fibroblastic focus (arrow).

**B.** Anti-LTBP2 and anti-elastin staining. The positivity of LTBP2 and elastin was partially overlapping (triangles). The fibroblastic focus (arrow) did not show apparent positivity for both proteins.

**C.** Anti-LTBP2 and anti-fibrillin-1 staining. Similar to elastin, the positivity of fibrillin-1 was also partially overlapping with LTBP2 (triangles). The fibroblastic focus (arrow) did not show apparent positivity for both proteins.

All scale bars = 20  $\mu$ m.

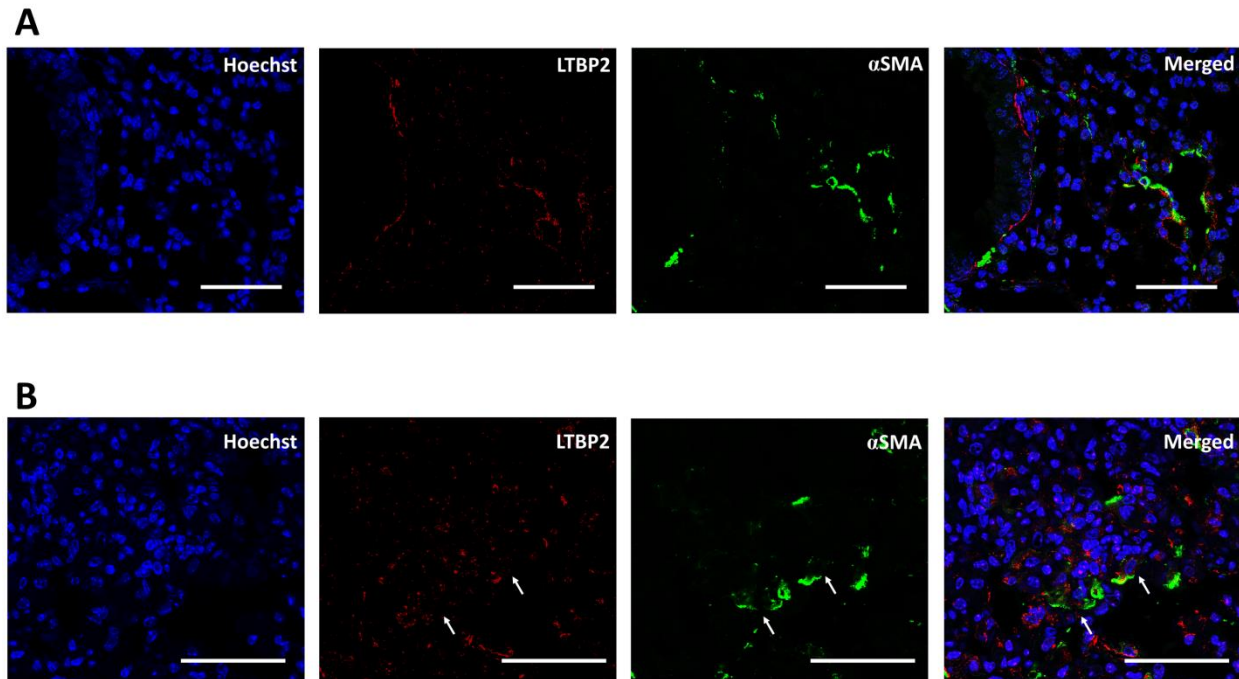

**Figure S3.** Immunofluorescence images of mouse lungs

**A** (Untreated mouse lung). Latent transforming growth factor- $\beta$  binding protein-2 (LTBP2) and  $\alpha$ -smooth muscle actin ( $\alpha$ SMA) were observed only around the bronchiole and the blood vessel.

**B** (Bleomycin-treated mouse lung). LTBP2 positivity was increased in the interstitium mainly as an extracellular matrix protein. Some of the proteins colocalized with  $\alpha$ SMA-positive myofibroblasts (arrows).

All scale bars = 50  $\mu$ m.

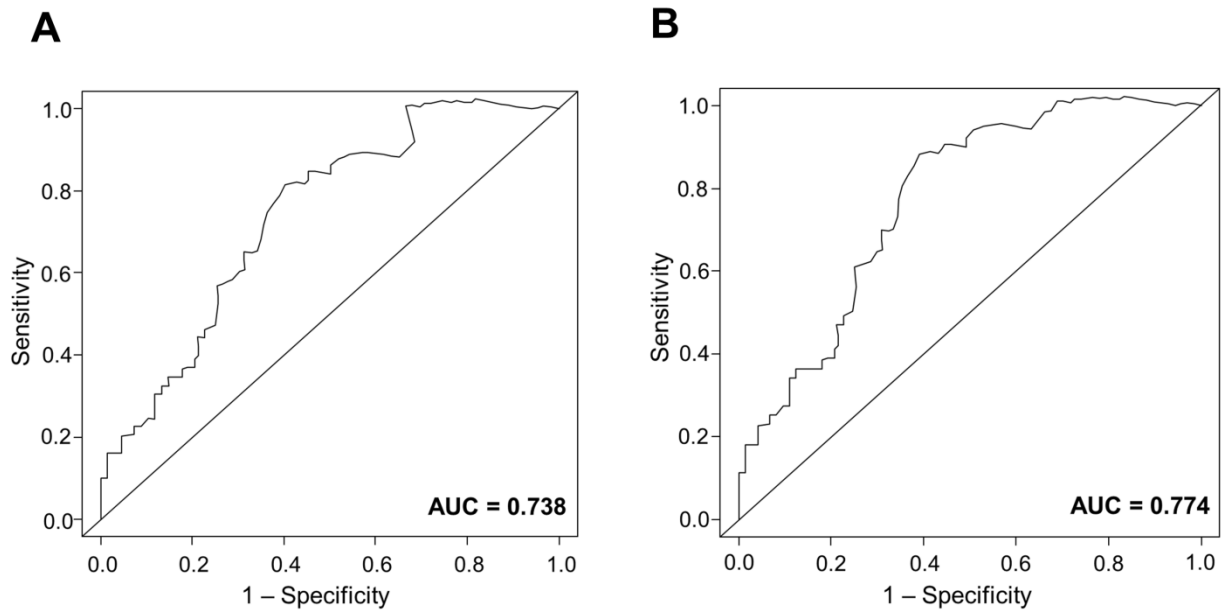

**Figure S4.** Receiver operating characteristic curves for serum latent transforming growth factor- $\beta$  binding protein-2 concentrations (evaluated at the time of diagnosis of idiopathic pulmonary fibrosis) during the 60-month follow-up

**A.** The endpoint was set at all-cause death.

**B.** The endpoint was set at death by respiratory events.
